# Supplementary material for: Mutually exclusive sense–antisense transcription at FLC facilitates environmentally induced gene repression
Source: PubMed Central journal article supplement (PMC5059766; doi:10.1038/ncomms13031), 2016-10-07
Supplement: ncomms13031-s1.pdf [file ncomms13031-s1.pdf]

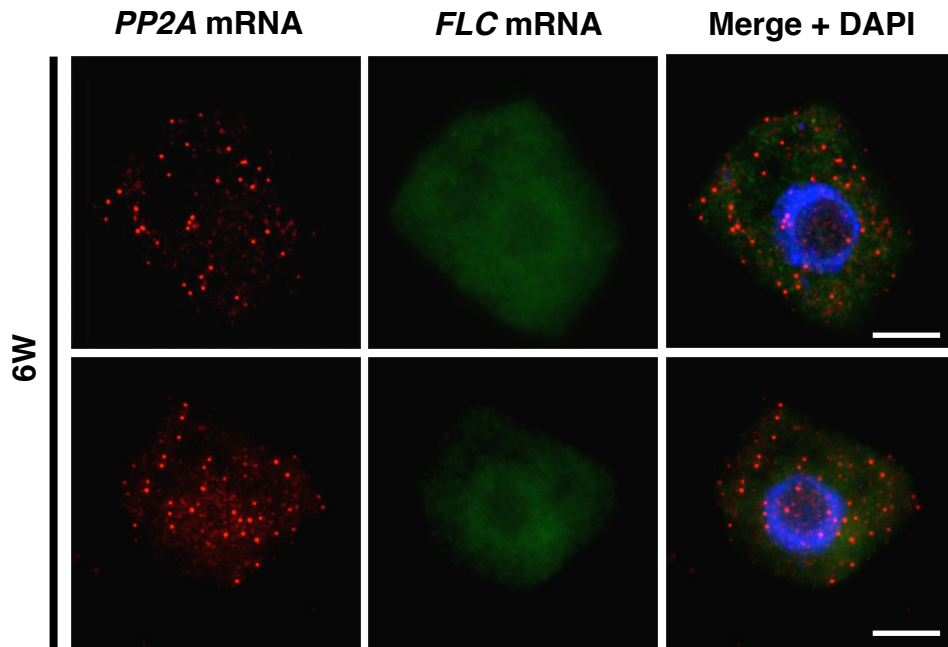

**Supplementary Figure 1 – smFISH analysis for *PP2A* and *FLC* mRNA in 6 weeks vernalized sample.** Representative images of cells hybridized with exonic smFISH probes against *FLC* (green) and *PP2A* (red) in plants vernalized for 6 weeks. *FLC* mRNA signals are absent, whilst *PP2A* is detected. DNA labeled with DAPI (blue). Scale bar: 5  $\mu$ m.

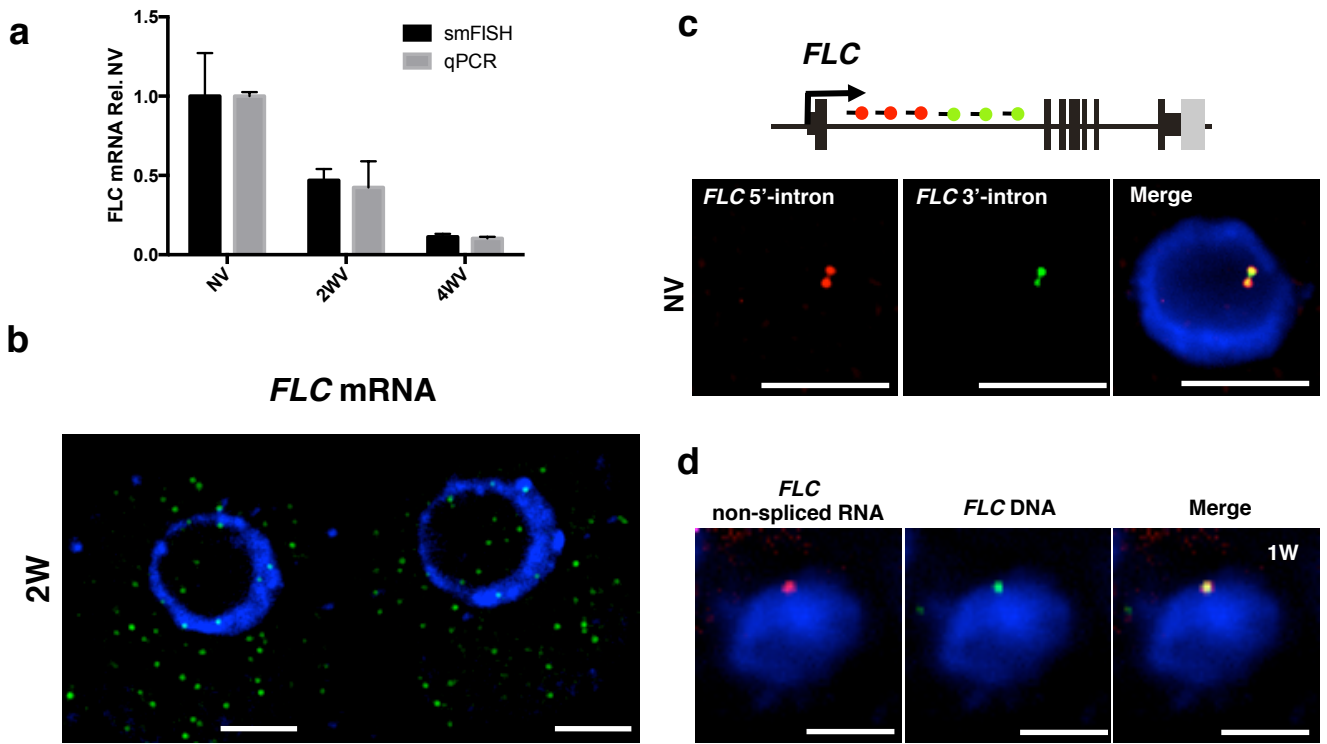

**Supplementary Figure 2** – (a) Fold change in expression for *FLC* mRNA as measured by FISH and real-time RT-PCR (according to Duncan et al. 2015). Error bars are  $\pm$  SD. N=300 cells for smFISH and N=3 biological replicates for qPCR. (b) Representative images of cells hybridized with exonic smFISH probes against *FLC* (green) in plants vernalized for 2 weeks. No obvious localization of *FLC* mRNA is observed. (c) Schematic of the intronic probes used to detect the 5' (red) and 3' (green) end of *FLC* intron 1 and representative image showing co-localisation of 5'/3' signals. (d) Representative image of a nucleus showing colocalization of *FLC* intronic RNA smFISH signals (red) with *FLC* DNA FISH signals (green). DNA labeled with DAPI (blue). Scale bar: 5  $\mu$ m.

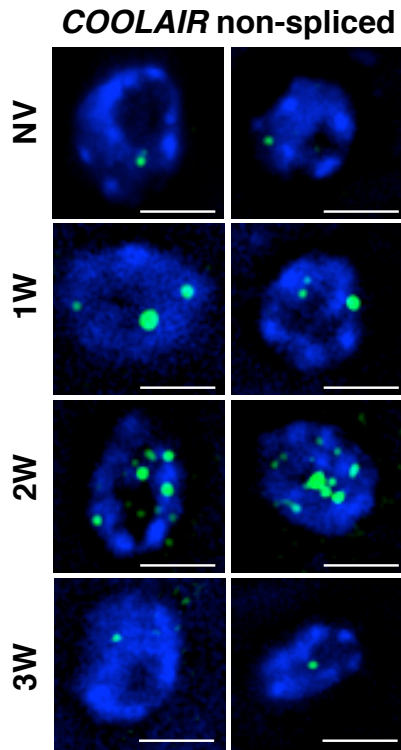

**Supplementary Figure 3 – *COOLAIR* subcellular localisation.** Additional examples of representative images of nuclei hybridized with intronic smFISH probes against *COOLAIR* (green) in non-vernalized plants (NV) and plants exposed to different weeks of cold (1W, 2W, 3W). DNA labeled with DAPI (blue). Scale bar: 5  $\mu$ m.

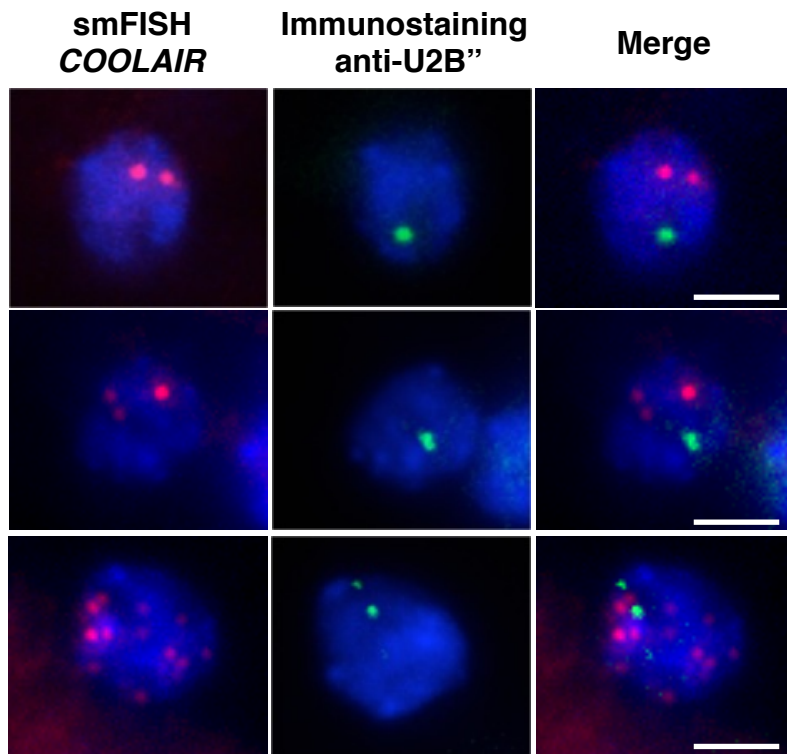

**Supplementary Figure 4 – *COOLAIR* foci do not colocalize with Cajal Bodies.** As we describe in the methods, we performed a protocol in which we combined Immunofluorescence and smFISH, here using an antibody against a Cajal body marker, the splicing protein U2B'' (green), and intronic smFISH probes against *COOLAIR* (red). Nuclei from plants exposed to 2 weeks of cold. Scale bar: 5  $\mu$ m.

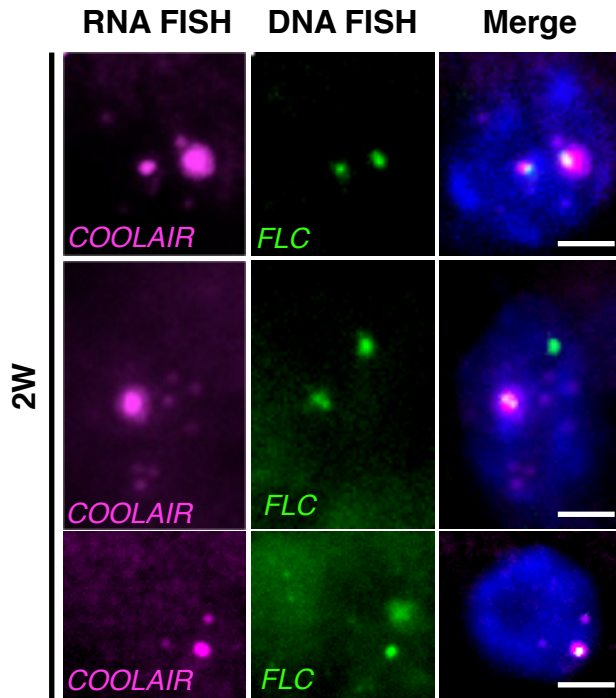

**Supplementary Figure 5 – Colocalization of *COOLAIR* non-spliced RNA with *FLC* DNA.** As we describe in the methods, we performed sequential RNA-DNA FISH, here we show additional examples of nuclei presenting colocalization of *COOLAIR* non-spliced RNA FISH signals (magenta) with *FLC* DNA FISH signals (green). Scale bar: 5  $\mu$ m.

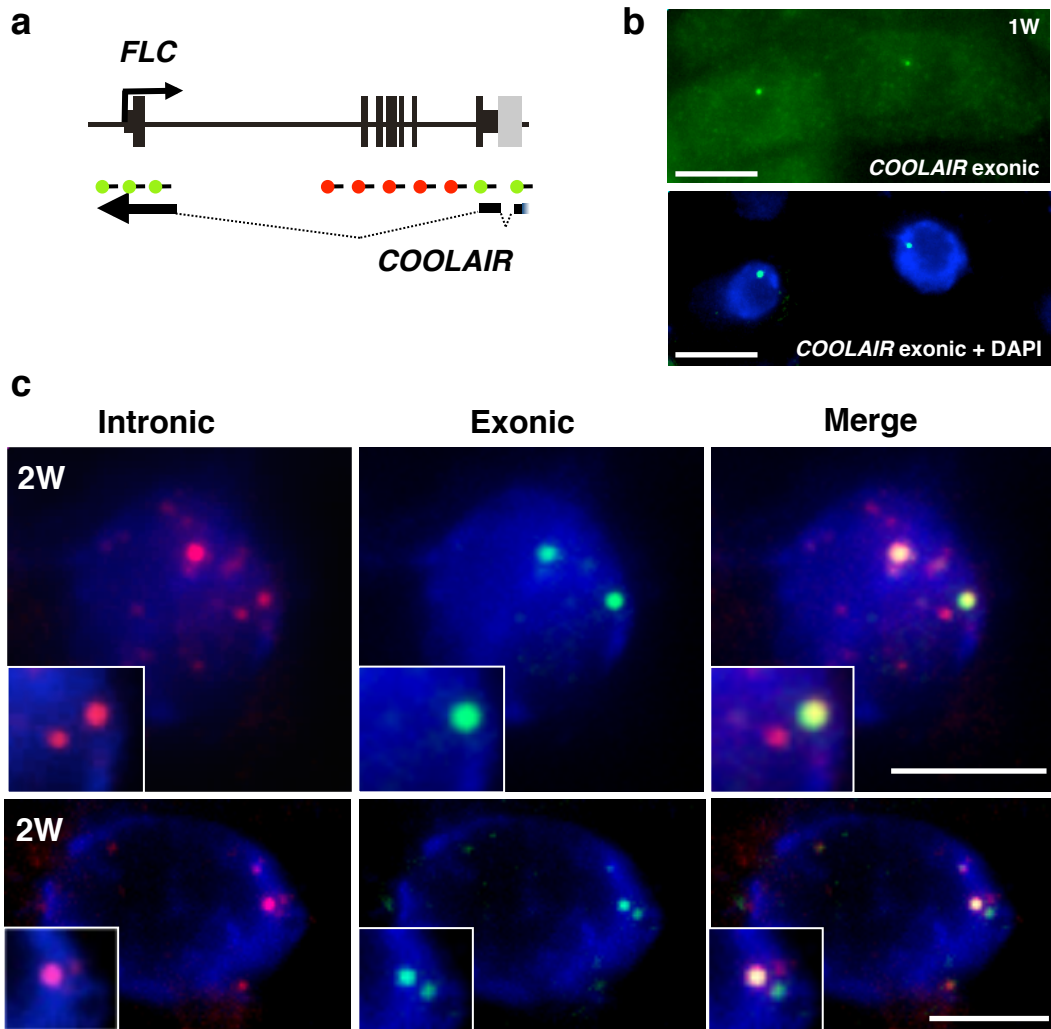

**Supplementary Figure 6 – Double labeling with *COOLAIR* intronic and exonic probes.** (a) Schematic of the probe locations used to detect *COOLAIR* introns (red) and exons (green). (b) Representative image of cells from plants exposed to 1 week of cold, hybridized with exonic smFISH probes for *COOLAIR* showing nuclear signal only. Scale bar: 10  $\mu$ m. (c) Representative images of nuclei from plants exposed to 2 weeks of cold, hybridized with *COOLAIR* intronic (red) and exonic (green) probes. Strong colocalization was found with these two probe sets at large foci, but very little colocalization was observed at smaller foci. In most cases smaller foci showed intronic signals only (upper panel) but in some rare cases we observed small foci labeling only with exonic probes (lower panel). DNA labeled with DAPI (blue). Scale bar: 5  $\mu$ m.

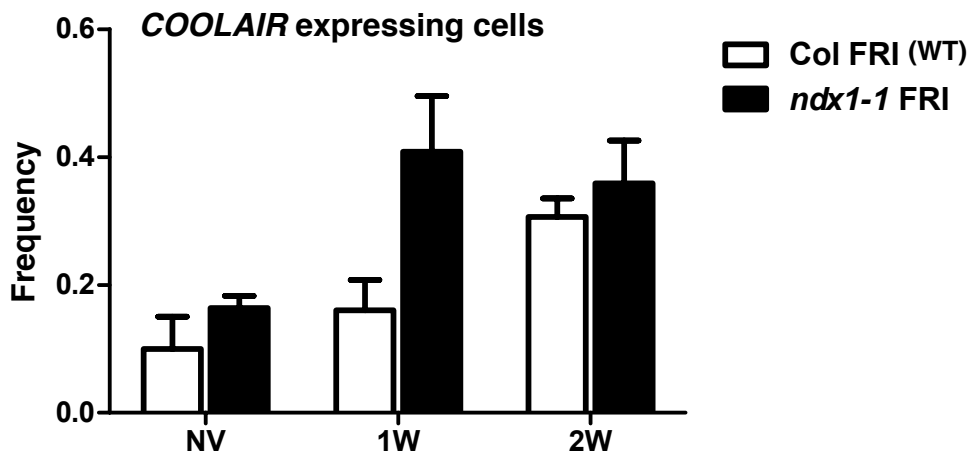

**Supplementary Figure 7 – *ndx1-1* mutant shows increased number of *COOLAIR* expressing cells.** Frequency of cells showing *COOLAIR* non-spliced signals with increasing cold exposure (NV, 1W, 2W) in wild-type ColFRI (WT) and *ndx1-1*FRI. Error bars are +/- SEM, with N=250 cells.

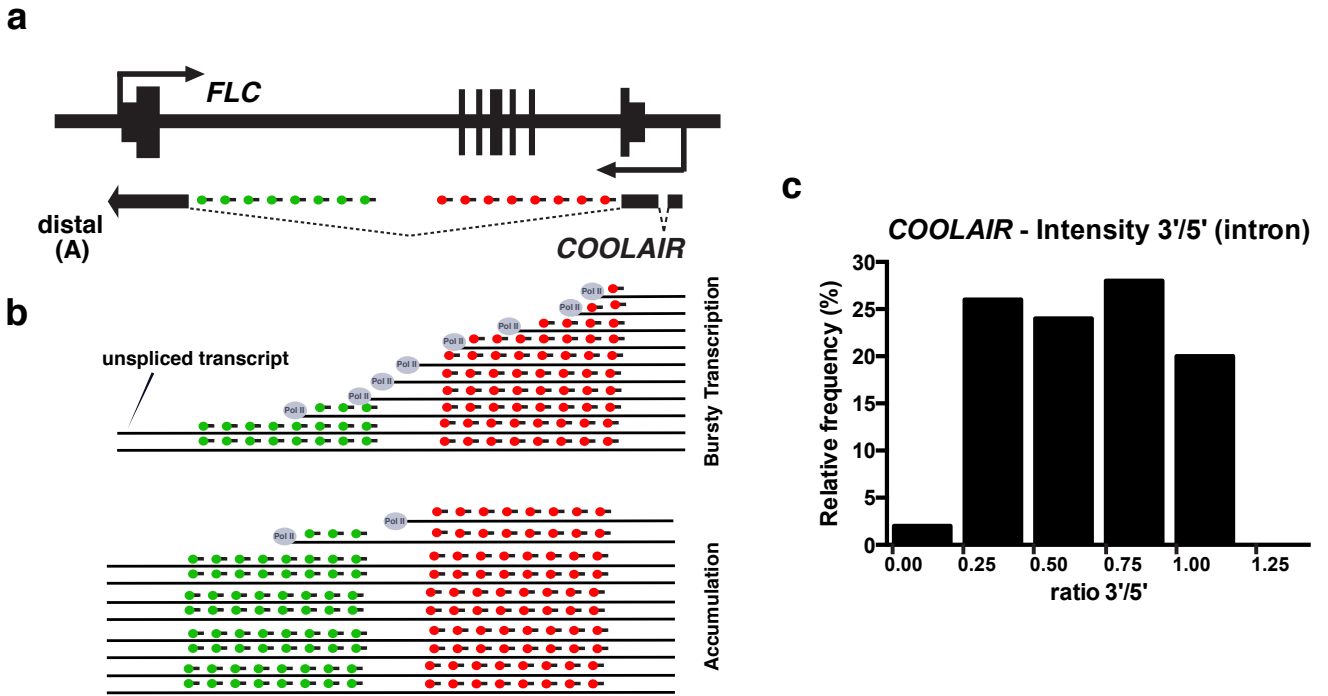

**Supplementary Figure 8 – Schematic of double labelling experiment with 5' and 3' end probes for *COOLAIR* largest intron.** (a) Schematic of the probes used to detect the 5' (red) and 3'-ends (green) of *COOLAIR* largest intron. (b) Two alternative scenarios for *COOLAIR* transcription (Bursty Transcription and Accumulation at the locus) and the expected labelling pattern. (c) Frequency distribution of 3'/5' total integrated intensity ratio for *COOLAIR* intronic probes (N=50 cells).



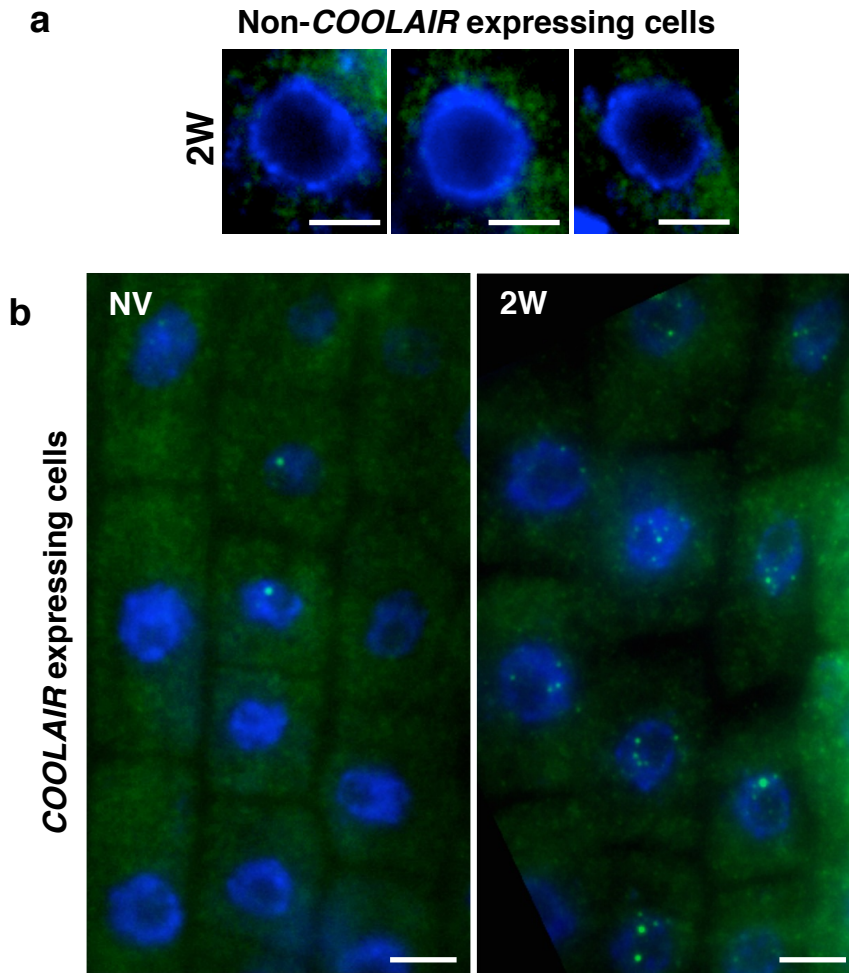

**Supplementary Figure 9 – *COOLAIR* expression pattern.** (a) Representative images of non-*COOLAIR* expressing cells hybridized with intronic smFISH probes against *COOLAIR* (green), in plants exposed to 2 weeks of cold. (b) Representative images of *COOLAIR* expressing cells (vasculature precursor cells) hybridized with intronic smFISH probes against *COOLAIR* (green), plants either non-vernalized plants (NV) or exposed to 2 weeks of cold (2W). DNA labeled with DAPI (blue). Scale bar: 5  $\mu$ m.

**Supplementary Table 1: smFISH probe sequences used to detect non-spliced *FLC* sense transcripts.** These probes were labelled with Quasar570 and ordered from Biosearch Technologies.

| Sense <i>FLC</i> Intron 1 Probes | Sequences (5'-3')     |
|----------------------------------|-----------------------|
| 1                                | gatccgccggaaaaaacca   |
| 2                                | catgtatctatcatggtcgc  |
| 3                                | cacgacattgttctccta    |
| 4                                | caacaacatcgagcacgcat  |
| 5                                | ctctatagatctcccgaag   |
| 6                                | acattgttcagcattaacc   |
| 7                                | caatagctgcacaatgtgt   |
| 8                                | aggccacagcaaatagtagg  |
| 9                                | aggctgagttttgaaagct   |
| 10                               | tgaagtagcatatgtgcggt  |
| 11                               | gcacacgacgatttgattc   |
| 12                               | agaccagttatgtacagca   |
| 13                               | ttataaatctcccgaagct   |
| 14                               | tccttttaccattaacctc   |
| 15                               | ttccaattaatgtggctt    |
| 16                               | gtgtaactgcaagagtggga  |
| 17                               | attgaggttgaggattgtca  |
| 18                               | ggtgtgtgattgtcgatt    |
| 19                               | attcctagaggcaccaaaag  |
| 20                               | tagatccgtaccaaagaggt  |
| 21                               | tggagggtttagtagacac   |
| 22                               | gaccaacatggccaaactac  |
| 23                               | atcaagtgagaatcgccag   |
| 24                               | gacctaaactaggggtgaaca |
| 25                               | tagtcaggtgtctcgacaat  |
| 26                               | tccacgttctaaaaggcttc  |
| 27                               | gctctttgcatcaacctaaag |
| 28                               | gccctgaagttactactaac  |
| 29                               | cggtctccattttgttatt   |
| 30                               | tacatggaccgagctcttaga |
| 31                               | gtatgaggaagccaaactcc  |
| 32                               | tgtggcggaaccagataac   |
| 33                               | gctagtattgatgaccata   |
| 34                               | caaggttttccagcgata    |
| 35                               | ggtaacatcagctctttggt  |
| 36                               | aaacgcctcttcatgagtt   |
| 37                               | ctttctttttgatcccag    |
| 38                               | acctattaccctctatttt   |
| 39                               | ccataccacaacttttagca  |
| 40                               | agagattcagagcttcatt   |
| 41                               | tagtgaagactgctccaa    |
| 42                               | ccaagtacacagactgagtc  |
| 43                               | gccacaatgtgatgacatgg  |
| 44                               | agcccaatcttaaatgcaa   |
| 45                               | tccagattgttctatgcat   |
| 46                               | ccctaaacataagcctctac  |
| 47                               | tagcgctggcttgattaac   |
| 48                               | agcacatctgaattccact   |

**Supplementary Table 2: smFISH probe sequences used to detect *FLC* sense spliced.**  
 These probes were labelled with Quasar670 and ordered from Biosearch Technologies.

| Sense <i>FLC</i> Exon Probes | Sequences (5'-3')    |
|------------------------------|----------------------|
| 1                            | tttttttccctttctcg    |
| 2                            | actaagcgtttctcttct   |
| 3                            | tcaggttgggtcaagtcg   |
| 4                            | gcttctgccctaattgat   |
| 5                            | ctagtttttctcccatg    |
| 6                            | ttgtctcaatcgctgat    |
| 7                            | gaaggcgactgtcggctac  |
| 8                            | tgagaccgtgcgacgttg   |
| 9                            | gaaagctgacgagctttct  |
| 10                           | gacggatgctgcacagagaa |
| 11                           | gaggcggagacgacgagaag |
| 12                           | gaggagaagctgtagagctt |
| 13                           | aggatctgaccagggtatc  |
| 14                           | atgctgttcccatatcgat  |
| 15                           | ccaaggcttaagatcatca  |
| 16                           | agtcagagctttgactga   |
| 17                           | agtagctcatagtggaacc  |
| 18                           | aagctgctatccacaagtt  |
| 19                           | cattttgacattgatccc   |
| 20                           | ccagtggaacaagagcatcg |
| 21                           | agggcagctcaagggttc   |
| 22                           | tctcttggctctagtcacg  |
| 23                           | acaagctcaacatgagtc   |
| 24                           | gcattttccttttctta    |
| 25                           | caaacctggttctcttctt  |
| 26                           | atccaaggaatatctggcta |
| 27                           | tcactttctttttgtctt   |
| 28                           | ctccatctgtacgataatca |
| 29                           | ctgctcccacatgatgatta |
| 30                           | aggtgacatctccatctcag |
| 31                           | agattgtcggagattgtcc  |
| 32                           | taagtagtgggagagtcacc |
| 33                           | ttcaaccgccgatttaagg  |
| 34                           | cccttatcagcggataatt  |
| 35                           | ggccaaagagagagtattaa |
| 36                           | agtatcacacacaagtctc  |
| 37                           | agtattgactagtccgctc  |
| 38                           | gttcatcaacctttgtctt  |

**Supplementary Table 3: smFISH probe sequences used to detect spliced *PP2A* transcripts.** These probes were labelled with Quasar570 and ordered from Biosearch Technologies.

| <i>PP2A</i> Exon Probes | Sequences (5'-3')     |
|-------------------------|-----------------------|
| 1                       | ccgagcgatctatcaatcag  |
| 2                       | gacatcctcaccaaaactca  |
| 3                       | tcgggtataaaggctcatca  |
| 4                       | tagctcgtcgataagcacag  |
| 5                       | ccaagagcacgagcaatgat  |
| 6                       | atcaactctttctgtcct    |
| 7                       | catcgtcattgttctacta   |
| 8                       | atagccaaaagcacctcatc  |
| 9                       | atacagaataaaacccccca  |
| 10                      | caagttcctcaacagtggga  |
| 11                      | tcatctgagcaccaattcta  |
| 12                      | tagccagaggagtgaatgc   |
| 13                      | cattcaccagctgaaagtcg  |
| 14                      | ggaaaatcccacatgctgat  |
| 15                      | atattgatcttagctccgtc  |
| 16                      | attggcatgtcatcttgaca  |
| 17                      | aaattagtgtgctgagctct  |
| 18                      | gctgattcaattgtagcagc  |
| 19                      | ccgaatctgatcatcttgc   |
| 20                      | caaccctcaacagccaataa  |
| 21                      | ctccaacaattccaagag    |
| 22                      | caaccatataacgcacacgc  |
| 23                      | agtagacgagcatatgcagg  |
| 24                      | gaacttctgcctcattatca  |
| 25                      | cacaggggaagaatgtgctgg |
| 26                      | tgacgtgctgagaagagtct  |
| 27                      | cccattataactgatgccaa  |
| 28                      | tggttcacttggtcaagttt  |
| 29                      | tctacaatggctggcagtaa  |
| 30                      | cgattatagccagacgtact  |
| 31                      | gactggccaacaaggggaata |
| 32                      | catcaaagaagcctacacct  |
| 33                      | ttgcatgcaaagagcaccaa  |
| 34                      | acggattgagtgaacctgt   |
| 35                      | cttcagattgttgacagcag  |
| 36                      | ggaccaactcttcagcaag   |
| 37                      | ggaactatagctgcatcgc   |
| 38                      | gtgggtgttaatcatctct   |
| 39                      | tgcacgaagaatcgtcatcc  |
| 40                      | ttactggagcgagaagcga   |
| 41                      | ctctgtcttagatgcagtt   |
| 42                      | gaacatgtgatctcggatcc  |
| 43                      | catcattttgccacgtaa    |
| 44                      | cgtatcatgttccacaac    |
| 45                      | atcaacatctgggtctcac   |
| 46                      | ttggagagcttgattgcca   |
| 47                      | acacaattcgttgctgtctt  |
| 48                      | cgccaacgaacaaatcaca   |

**Supplementary Table 4: smFISH probe sequences used to detect non-spliced *COOLAIR* transcripts (Intron 5'-end).** These probes were labelled with Quasar570 and ordered from Biosearch Technologies.

| Antisense <i>FLC</i> Intron Probes | Sequences (5'-3')     |
|------------------------------------|-----------------------|
| 1                                  | gtagtgctactttacatgc   |
| 2                                  | ttccaactccaagtgtctag  |
| 3                                  | ttatggtagggttgatcc    |
| 4                                  | gtttatggaccgattagttt  |
| 5                                  | agttaatcacctttaacca   |
| 6                                  | ggttgtgtaaacggtgtcta  |
| 7                                  | gttcaatattggttccttg   |
| 8                                  | tggtctggttcagctagtt   |
| 9                                  | ttcttgattctttcaggt    |
| 10                                 | tctgggttggtagagattc   |
| 11                                 | gaacctttatagctcggtt   |
| 12                                 | ggtttggttcattggaga    |
| 13                                 | taggtttggttcttctct    |
| 14                                 | aattccggtgttgacata    |
| 15                                 | acggctggttagagtaagg   |
| 16                                 | gggtagtgagattattact   |
| 17                                 | gttgtggtagttggttta    |
| 18                                 | ttcttcaagattagggca    |
| 19                                 | gtctgtatagttgtattct   |
| 20                                 | cattcactagttagcacttt  |
| 21                                 | tatatagtcagtgcatctca  |
| 22                                 | acactcttatgcttcagat   |
| 23                                 | atgccatgtacatggacat   |
| 24                                 | aataagcactgcgtgtgtg   |
| 25                                 | acgaaagctacatttcctaa  |
| 26                                 | acgaaagctacatttcctaa  |
| 27                                 | attctgaagttgtaggttt   |
| 28                                 | cttcatagtttggatcc     |
| 29                                 | gcttgcacacatattgcaa   |
| 30                                 | ctctgtactttaagtctgc   |
| 31                                 | gatatacctctctgtgtt    |
| 32                                 | gctaccaatttattgtaca   |
| 33                                 | cgtgctgctttgtttgtg    |
| 34                                 | ctgaatttggttgcgaga    |
| 35                                 | atttcgtaatgtctactcct  |
| 36                                 | ctctccaccttgattacaa   |
| 37                                 | tctctgtcccttttcatg    |
| 38                                 | ttcatagccctgtcttta    |
| 39                                 | atgcattatgcataccgcaa  |
| 40                                 | taaaatgagggtgggtgctcc |
| 41                                 | actattagttgcccagtgga  |
| 42                                 | atggagtttataaggcgta   |
| 43                                 | aacatttgaatctttccc    |
| 44                                 | atTTTTTgtcatctctcc    |
| 45                                 | agctagtagtttgatccta   |
| 46                                 | ttccagtgcccttttcaag   |
| 47                                 | gggttctctcaatgtttca   |
| 48                                 | gttacgaatactagcgtgtt  |

**Supplementary Table 5: smFISH probe sequences used to detect exonic sequences in *COOLAIR* transcripts.** These probes were labelled with Quasar670 and ordered from Biosearch Technologies.

| Antisense <i>FLC</i><br>Exon Probes | Sequences (5'-3')    |
|-------------------------------------|----------------------|
| 1                                   | atittgcaacagggacgtgg |
| 2                                   | acagtgaagaagcctacggc |
| 3                                   | gtcaaaaactgtgtttgct  |
| 4                                   | gagtgatgtgtctcact    |
| 5                                   | tcgtgtgagaattgcatcga |
| 6                                   | ggttgatgaactttgtacct |
| 7                                   | gagactttgtgtgatact   |
| 8                                   | ttaatactctctttggcc   |
| 9                                   | taagggcgagcgtttgtata |
| 10                                  | agatatgtaattattccgct |
| 11                                  | acctaaatcggcggttgaa  |
| 12                                  | gactctcccactactaatt  |
| 13                                  | aatctccgacaatctccg   |
| 14                                  | tgagatggagatgtcacctg |
| 15                                  | atcatcatgtggagcagaa  |
| 16                                  | gattatcgtacagatggaga |
| 17                                  | gtgaatagtgtttgacct   |
| 18                                  | tattccttgatagaagaca  |
| 19                                  | gttgattttggtggtgga   |
| 20                                  | acctctgtagtgttttta   |
| 21                                  | ttacttttactgctcca    |
| 22                                  | cctttatctctgtttgt    |
| 23                                  | acctgggtttcattgttc   |
| 24                                  | gcgataagtacgcctttcc  |
| 25                                  | aagctctacagctctcctc  |
| 26                                  | ttctgtctctgtgacgcat  |
| 27                                  | tcacgagaaagctcgtcag  |
| 28                                  | tttccaacgtcgcaacgg   |
| 29                                  | caaaagtagccgacaagtca |
| 30                                  | ggagagaagccatgggaaga |
| 31                                  | caaattagggcacaaagccc |
| 32                                  | acttgaacccaaacctgagg |
| 33                                  | aaaacgcttagtatctccgg |
| 34                                  | aaatatctgcccgcgaag   |
| 35                                  | ctcgtttacccccaaaaaaa |
| 36                                  | tatttggtttttgcatca   |
| 37                                  | cgtggcaatctgtctcaa   |

**Supplementary Table 6: smFISH probe sequences used to detect non-spliced *COOLAIR* transcripts (Intron 3'-end).** These probes were labelled with Quasar670 and ordered from Biosearch Technologies.

| Antisense <i>FLC</i> Intron Probes | Sequences (5'-3')    |
|------------------------------------|----------------------|
| 1                                  | atgtcattttcaatctgccg |
| 2                                  | tgcctttgatgactttct   |
| 3                                  | aagccagcgctatcactaaa |
| 4                                  | gtttagggttctatgtacc  |
| 5                                  | aatctggacagtagaggctt |
| 6                                  | tgcatttaagattggggct  |
| 7                                  | atcacattgtggctcatcaa |
| 8                                  | ttactcggtttactcca    |
| 9                                  | ttctagactcagctgtgt   |
| 10                                 | aattggaagcagcttccac  |
| 11                                 | ttgtcgtagtcctgatcaa  |
| 12                                 | gctggaaaaaacctgtcct  |
| 13                                 | tgggtcatcaatactagctc |
| 14                                 | gccacatcatcattatcatc |
| 15                                 | tggcttccatcactatg    |
| 16                                 | ctaagactcggtcctatgat |
| 17                                 | aaaatggaagaccggcttcc |
| 18                                 | attggaacctcacagtttct |
| 19                                 | ttatctgtcttagtcgcttc |
| 20                                 | ttgtggatcttctaggca   |
| 21                                 | tagaacgtggaacccttagt |
| 22                                 | gactagaactcctggctta  |
| 23                                 | ccttgaattgtcgagacac  |
| 24                                 | catgttggtcaagatcgctg |
| 25                                 | tctgggtagtgctactac   |
| 26                                 | ccacaacactgtctcatg   |
| 27                                 | ttggtgccttaggaaatt   |
| 28                                 | tcttgtcttttgcctgg    |
| 29                                 | cttgtgtctttgtcacaca  |
| 30                                 | ccacaacctcaatctttgt  |
| 31                                 | tgactttgtcctattcgtt  |
| 32                                 | tatcgccttaaatcttatca |
| 33                                 | acacacatagattgcctca  |
| 34                                 | aaggttatagttcccact   |
| 35                                 | tccttttatgggatatgct  |
| 36                                 | gattgtatatgcacgtccg  |
| 37                                 | cacaatcgtcgtgtgctata |
| 38                                 | ggtatcgttgcgattctt   |
| 39                                 | tactaccgcacatagcta   |
| 40                                 | aattcctatcttgcctggg  |
| 41                                 | acattgtgcagctattgact |
| 42                                 | gctatggggttaatgctgaa |
| 43                                 | tgacttacgggagatctat  |
| 44                                 | attggatctctcggattgt  |
| 45                                 | tcttaccttagagattcct  |
| 46                                 | gtgaagttcaagccatctt  |
| 47                                 | gcatgtcattcacgattgt  |
| 48                                 | gtttgttttttctgcca    |

**Supplementary Table 7: smFISH probe sequences used to detect *FLC* sense Intron1 5'-end.** These probes were labelled with Quasar570 and ordered from Biosearch Technologies.

| Antisense <i>FLC</i> Intron Probes | Sequences (5'-3')     |
|------------------------------------|-----------------------|
| 1                                  | ccaggttaaggaaaaggcgta |
| 2                                  | gatccgccggaaaaaacca   |
| 3                                  | catgtatctatcatggtcgc  |
| 4                                  | gttctcctaaattgggt     |
| 5                                  | gctaaaaagcttcttcacga  |
| 6                                  | tccatgcagaattttttt    |
| 7                                  | tgacatgcaattttttcca   |
| 8                                  | aacatcgagcacgcacaga   |
| 9                                  | atggcttgaacttcactca   |
| 10                                 | tgattgcatacaaatccga   |
| 11                                 | aactctatagatctccgta   |
| 12                                 | acattgttcagcattaacct  |
| 13                                 | caatagctgcacaatgtgt   |
| 14                                 | aggccacagcaagatagg    |
| 15                                 | aggctgagtttttgaagct   |
| 16                                 | tgaagtagcatatgtgcggt  |
| 17                                 | tcgcaatcgataaccagatt  |
| 18                                 | gcacacgacgattgtgattc  |
| 19                                 | agaccagtttatgtacagca  |
| 20                                 | ttataaatctcccgacgt    |
| 21                                 | accattaacctatactaat   |
| 22                                 | accaaactcttgatccttt   |
| 23                                 | ttccaattaatgtggctt    |
| 24                                 | accaattcatcttttagtca  |
| 25                                 | tcttaaatagcatatccca   |
| 26                                 | ctgcaagagtgggaaactat  |
| 27                                 | tgaggcaaatctatgtgtgt  |
| 28                                 | attgaggtgtggattgtca   |
| 29                                 | ggtgtgtgattgtcgatt    |
| 30                                 | gatacaaaggtgtgtgaca   |
| 31                                 | acaaggctgtgtaatgaca   |
| 32                                 | attcctagaggcaccaaaag  |
| 33                                 | gacaagtgttgggatttt    |
| 34                                 | gaggttggtattcttacct   |
| 35                                 | ttcattatagatccgtacca  |
| 36                                 | caccagattcaatttgaca   |
| 37                                 | tggaggggtgtagtagacac  |
| 38                                 | actacaaccattgggtatt   |
| 39                                 | tcttgaccaacatggcctaaa |
| 40                                 | atcaagtgagaatcggccag  |
| 41                                 | gacctactaggggtgaaca   |
| 42                                 | gtgtctcgacaattccaagg  |
| 43                                 | taagaccaggagtcttagtc  |
| 44                                 | gttctaaaaggcttctctt   |
| 45                                 | actgagtaactaagggttcc  |
| 46                                 | gctcttgcatcaacctaaag  |
| 47                                 | atcagtcctattgtgaagtt  |



**Supplementary Table 8: smFISH probe sequences used to detect *FLC* sense Intron1 3'-end.** These probes were labelled with Quasar570 and ordered from Biosearch Technologies.

| Antisense <i>FLC</i> Intron Probes | Sequences (5'-3')     |
|------------------------------------|-----------------------|
| 1                                  | ttgacctagaagatccaaca  |
| 2                                  | tcttccatagaaggaagcga  |
| 3                                  | gccctgaagttacactaac   |
| 4                                  | ttcctatatttaaaccccaa  |
| 5                                  | atagaaactgtgaggttcca  |
| 6                                  | cttcattttgttattcac    |
| 7                                  | ctcctaagaataggaagccg  |
| 8                                  | tacatggaccgagcttaga   |
| 9                                  | gtatgaggaagccaaactcc  |
| 10                                 | tgtggcggttaaccagataac |
| 11                                 | gctagtattgatgaccata   |
| 12                                 | caaggtttttcagcgata    |
| 13                                 | tcggattttcaatgaacct   |
| 14                                 | tcagctctttgttgaagt    |
| 15                                 | atctcgtgtcaaaattgga   |
| 16                                 | aaacgcctcttcatgagtt   |
| 17                                 | ctttcttttgtatccag     |
| 18                                 | tcaggactacgaacaatggt  |
| 19                                 | ttctatcatgtttaccctt   |
| 20                                 | acaaaacctatttaccctct  |
| 21                                 | gcggttatcaaaccatta    |
| 22                                 | aaacacctatcctttaca    |
| 23                                 | ccataccacaacttttagca  |
| 24                                 | agagcttccattttggtttt  |
| 25                                 | attgcaacctctatcagaga  |
| 26                                 | tagtgaagactgcttccaa   |
| 27                                 | agactccctaacaatagca   |
| 28                                 | ccaagtacacagactgagtc  |
| 29                                 | gccacaatgtgatgacatgg  |
| 30                                 | gcaattttattttccaga    |
| 31                                 | agccccaatcttaaatgcaa  |
| 32                                 | gcatttatgtttgtaatct   |
| 33                                 | tctactgtccagattgttc   |
| 34                                 | gtaagggtacataagaacc   |
| 35                                 | tagcgctggcttgattaac   |
| 36                                 | gtcatacaaaggcatacaga  |
| 37                                 | atgacattttccctcaaaga  |
| 38                                 | atgtgggtaacatgtattt   |
| 39                                 | gctcaaagattagttatcca  |
| 40                                 | gatattttttctctca      |
| 41                                 | tgttcttagcttgtaagca   |
| 42                                 | tctgaattccacttttca    |
| 43                                 | ttcatgtttaagcagtagca  |
| 44                                 | acacgctagatttcgtaaca  |
| 45                                 | gagagaacaccttaccttt   |
| 46                                 | aggccactggaaactatgaa  |
| 47                                 | aactactagctaacccttga  |
